# Supplementary material for: Effect of a mother-baby delivery pack on institutional deliveries: A community intervention trial to address maternal mortality in rural Zambia
Source: PubMed Central journal article supplement (PMC10927137; doi:10.1371/journal.pone.0296001), 2024-03-11

Figure 1: Recruitment algorithm

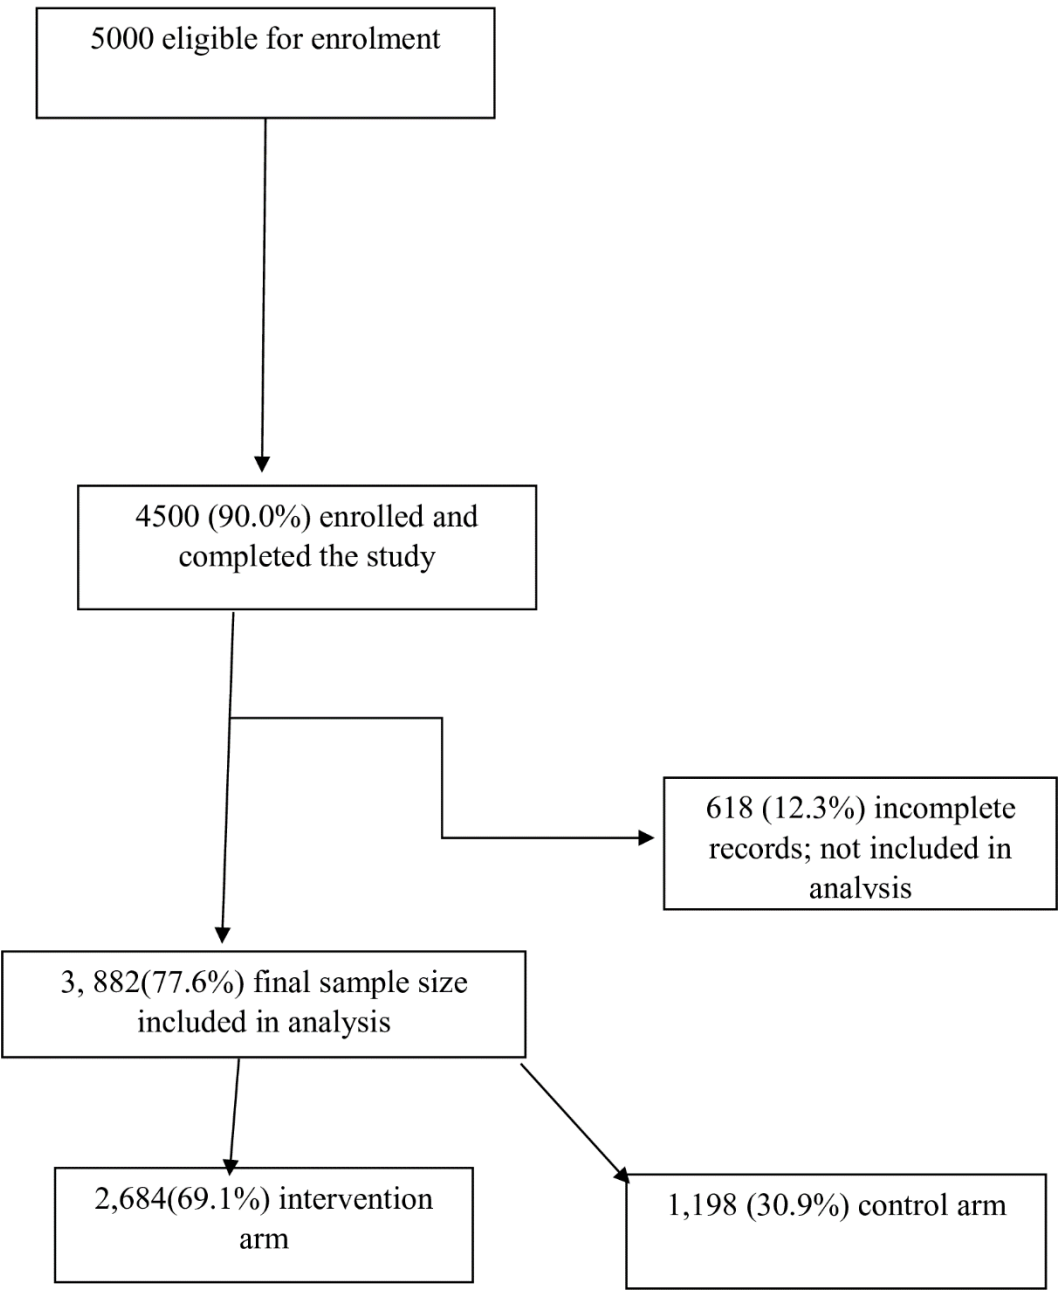

Supplement: pone.0296001.s001.pdf [file pone.0296001.s001.pdf]
