# Supplementary material for: Effect of a mother-baby delivery pack on institutional deliveries: A community intervention trial to address maternal mortality in rural Zambia
Source: PubMed Central journal article supplement (PMC10927137; doi:10.1371/journal.pone.0296001), 2024-03-11
Supplement: pone.0296001.s002.pdf [file pone.0296001.s002.pdf]

## CONSORT 2010 checklist of information to include when reporting a randomised trial

| Item                                                 | Recommendation                                                                                                                                    | Page |
|------------------------------------------------------|---------------------------------------------------------------------------------------------------------------------------------------------------|------|
| Title and abstract                                   | Identification as a randomised trial in the title                                                                                                 | 1    |
|                                                      | Structured summary of trial design, methods, results, and conclusions (for specific guidance see CONSORT for abstracts)                           | 2    |
| Introduction                                         |                                                                                                                                                   |      |
| Background                                           | Scientific background and explanation of rationale                                                                                                | 4    |
| Objectives                                           | Specific objectives or hypotheses                                                                                                                 | 5    |
| Methods                                              |                                                                                                                                                   |      |
| Trial design                                         | Description of trial design (such as parallel, factorial) including allocation ratio                                                              | 6    |
| Participants                                         | Enrolment and recruitment                                                                                                                         | 7    |
|                                                      | Eligibility criteria for participants                                                                                                             |      |
|                                                      | Describe the setting and locations where the data were collected                                                                                  |      |
| Interventions                                        | The interventions for each group with sufficient details to allow replication, including how and when they were actually administered             | 7    |
| Outcomes                                             | Completely defined pre-specified primary and secondary outcome measures, including how and when they were assessed                                | 7    |
|                                                      | Any changes to trial outcomes after the trial commenced, with reasons                                                                             |      |
| Study size                                           | How sample size was determined                                                                                                                    | 8    |
| Statistical methods                                  | Statistical methods used to compare groups for primary and secondary outcomes                                                                     | 9    |
|                                                      | If applicable, explain how loss to follow-up was addressed                                                                                        |      |
| Results                                              |                                                                                                                                                   |      |
| Participant flow (a diagram is strongly recommended) | For each group, the numbers of participants who were randomly assigned, received intended treatment, and were analysed for the primary outcome    | 11   |
|                                                      | For each group, losses and exclusions after randomisation, together with reasons                                                                  |      |
| Baseline data                                        | Table showing baseline demographic and clinical characteristics for each group                                                                    | 11   |
| Outcomes and estimation                              | For each primary and secondary outcome, results for each group, and the estimated effect size and its precision (such as 95% confidence interval) | 11   |
|                                                      |                                                                                                                                                   |      |
| Discussion                                           | Interpretation consistent with results, balancing benefits and harms, and considering other relevant evidence                                     | 13   |
|                                                      | Generalisability (external validity, applicability) of the trial findings                                                                         |      |
| Limitations                                          | Trial limitations, addressing sources of potential bias, imprecision, and, if relevant, multiplicity of analyses                                  | 15   |

|            |                                                                                 |    |
|------------|---------------------------------------------------------------------------------|----|
| Conclusion |                                                                                 | 16 |
| Funding    | Sources of funding and other support (such as supply of drugs), role of funders | 16 |
| References |                                                                                 | 17 |
