# Supplementary material for: Effect of a mother-baby delivery pack on institutional deliveries: A community intervention trial to address maternal mortality in rural Zambia
Source: PubMed Central journal article supplement (PMC10927137; doi:10.1371/journal.pone.0296001), 2024-03-11

# TROPICAL DISEASES

Tel/Fax +260212615444  
[tdrc-ethics@tdrc.org.zm](mailto:tdrc-ethics@tdrc.org.zm)

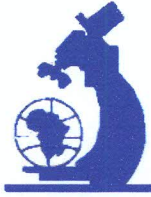

# RESEARCH CENTRE

P O Box 71769  
NDOLA, ZAMBIA

**TDRC ETHICS REVIEW COMMITTEE**  
**IRB REGISTRATION NUMBER: 00002911**  
**FWA NUMBER: 00003729**

---

TRC/ERC/04/09/2013

10<sup>th</sup> September, 2013

Dr. Victor Mukonka  
CBU School of Medicine  
P.o Box 71191

**Ndola**

Dear Dr. Mukonka,

**Sub: Improving Institutional Deliveries in Rural Zambia**

Reference is made to the protocol entitled “**Improving Institutional Deliveries in Rural Zambia.**”

On behalf of the Chairman of the TDRC Ethics Review Committee, I wish to inform you that your research protocol was reviewed and your responses to the comments that were earlier raised by reviewers were thoroughly attended to.

I, therefore, inform you that your protocol has been approved.

We wish you every success in the execution of this important study.

Yours Sincerely

**TROPICAL DISEASES RESEARCH CENTRE**

A handwritten signature in blue ink, appearing to read 'Eric M. Njunju', is written over the typed name.

Eric M. Njunju Bsc, Msc

**SECRETARY, TDRC ETHICS REVIEW COMMITTEE**

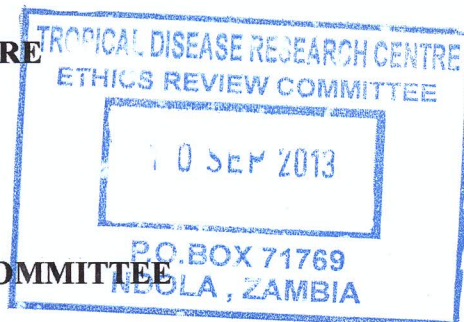

Supplement: pone.0296001.s004.pdf [file pone.0296001.s004.pdf]
